# Supplementary material for: Surface functionalisation of detonation diamond suitable for biological applications
Source: Royal Society of Chemistry journal article supplement (doi:10.1039/b601325b), 2006-01-01
Supplement: b601325b.pdf [file b601325b.pdf]

## Surface functionalisation of detonation diamond suitable for biological applications

Anke Krüger,<sup>\*a</sup> Yuejiang Liang<sup>a</sup>, Gerald Jarre<sup>a</sup> and Jochen Stegk<sup>a</sup>

<sup>a</sup> Otto-Diels-Institut für Organische Chemie, Christian-Albrechts-Universität zu Kiel, Otto-Hahn-Platz 3-4, Kiel, Germany. Fax: 49 (0)431 880-1558; Tel: 49 (0)431 880-1179; E-mail: akrueger@oc.uni-kiel.de

### Supplementary material

#### Thermogravimetry

The following table shows the relevant peaks in TGA. Measurements were carried out in Al<sub>2</sub>O<sub>3</sub> crucibles under nitrogen atmosphere with a heating rate of 4 K min<sup>-1</sup> using a STA-429 thermobalance (Netzsch, Germany). Figure S1 shows the corresponding thermogravimetric graphs that are not present in Fig. 5.

**Table S1** TGA data of functionalised nanodiamond materials

| Sample | T / °C (Δm <sub>1</sub> ) Step 1 <sup>a</sup> | T / °C (Δm <sub>2</sub> ) Step 2 | T / °C (Δm <sub>3</sub> ) Step 3 | T / °C (Δm <sub>4</sub> ) Step 4 | T / °C (Δm <sub>5</sub> ) Step 5 <sup>b</sup> | Δm (Δm <sub>eff</sub> ) <sup>c</sup> |
|--------|-----------------------------------------------|----------------------------------|----------------------------------|----------------------------------|-----------------------------------------------|--------------------------------------|
| 1      | 45 (-8.6 %)                                   | -                                | -                                | -                                | -                                             | -8.6 % (0 %)                         |
| 2      | 74 (-3.4 %)                                   | -                                | -                                | -                                | 430 (-7.5 %)                                  | -10.9 % (-7.8 %)                     |
| 4      | 67 (-2.1 %)                                   | 162 (-3.5 %)                     | -                                | 314 (-9.5 %)                     | 451 (-5.9 %)                                  | -21.0 % (-19.3 %)                    |
| 5      | 62 (-3.0 %)                                   | 207 (-8.9 %)                     | -                                | 289 (-7.0 %)                     | 416 (-5.9 %)                                  | -24.8 % (-22.5 %)                    |
| 6      | 70 (-2.5 %)                                   | 172 <sup>d</sup>                 | 220 (-9.5 %) <sup>d</sup>        | 294 (-6.7 %)                     | 419 (-7.6 %)                                  | -26.3 % (-24.3 %)                    |
| 7      | 66 (-2.2 %)                                   | 190 (-3.9 %)                     | 227 (-2.11 %)                    | 314 (-6.1 %)                     | 429 (-7.5 %)                                  | -21.7 % (-19.9 %)                    |
| 8      | 66 (-0.9 %)                                   | 176 (-2.0 %)                     | -                                | 295 (-6.3 %)                     | 416 (-6.1 %)                                  | -15.3 % (-14.5 %)                    |
| 9      | 76 (-2.4 %)                                   | 201 (-0.7 %)                     | 318 (-6.1 %)                     | 374 (-2.3 %)                     | 415 (-3.7 %)                                  | -15.2 % (-13.1 %)                    |

<sup>a</sup> desorption of surface bound water, <sup>b</sup> removal of the silane groups, <sup>c</sup> Δm: weight loss including water desorption, Δm<sub>eff</sub>: weight loss without water desorption, normalised on remaining functionalised nanodiamond, <sup>d</sup> combined weight loss of unresolvable peaks.

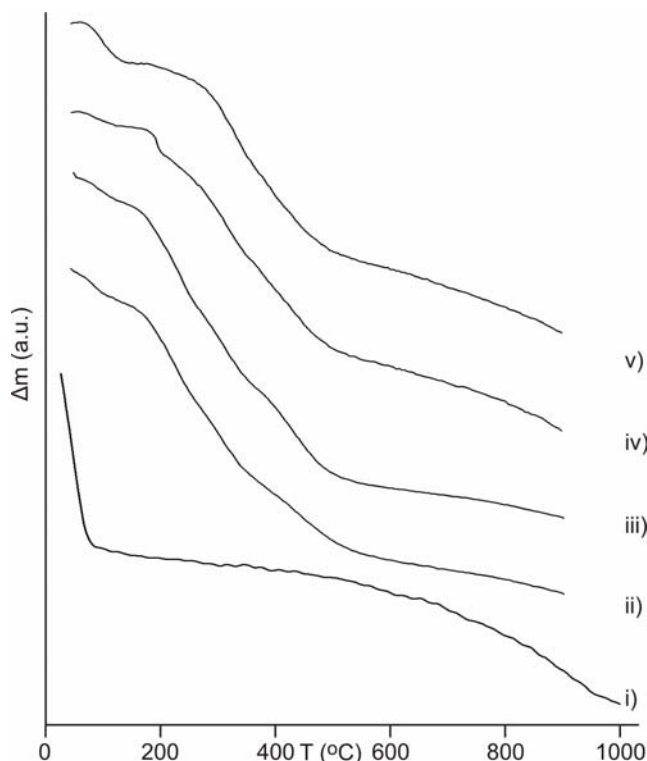

**Fig. S1** Thermogravimetric analysis of i) ND-OH, ii) ND-O-Si(OMe)<sub>2</sub>-(CH<sub>2</sub>)<sub>3</sub>-NH-Ser-Fmoc, iii) ND-O-Si(OMe)<sub>2</sub>-(CH<sub>2</sub>)<sub>3</sub>-NH-Phe-Fmoc, iv) ND-O-Si(OMe)<sub>2</sub>-(CH<sub>2</sub>)<sub>3</sub>-NH-Gly-Phe-Gly-Fmoc; v) ND-O-Si(OMe)<sub>2</sub>-(CH<sub>2</sub>)<sub>3</sub>-NH-Gly-Phe-Gly-Phe-Fmoc

### Particle size distribution

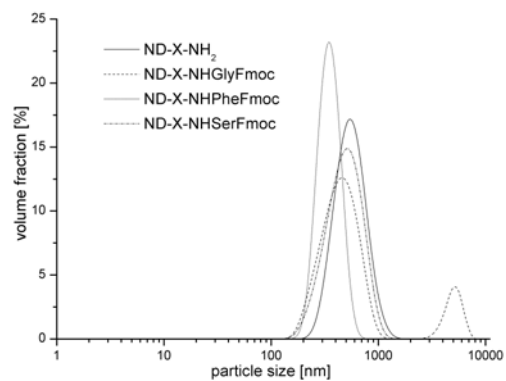

**Fig. S2** Particle size distribution of amino acid functionalised silanised nanodiamond materials ( $X = -(\text{CH}_3\text{O})_2\text{Si}-(\text{CH}_2)_3-$ ).
